# Supplementary material for: Symptomatic and functional outcomes after treatment with paliperidone palmitate 3-month formulation for 52 weeks in patients with clinically stable schizophrenia
Source: PubMed Central journal article supplement — Ther Adv Psychopharmacol. 2020 May 25;10:2045125320926347. doi: 10.1177/2045125320926347 (PMC7252374; doi:10.1177/2045125320926347), 2020-05-25
Supplement: Supplementary_Tables.pdf [file Supplementary_Tables.pdf]

## Supplementary Tables

**Supplementary Table 1:** Comorbid psychiatric and nervous system disorders at baseline (modified intent-to-treat population)

|                                        | Total (N=305) | LOCF endpoint symptomatic remission |            |
|----------------------------------------|---------------|-------------------------------------|------------|
|                                        |               | Yes (n=172)                         | No (n=133) |
| <b>Psychiatric disorders, n (%)</b>    | 10 (3.3)      | 2 (1.2)                             | 6 (6.0)    |
| Anxiety/Anxiety disorder               | 2 (0.7)       | 1 (0.6)                             | 1 (0.8)    |
| Depression                             | 2 (0.7)       | 1 (0.6)                             | 1 (0.8)    |
| Drug use disorder                      | 1 (0.3)       | 0                                   | 1 (0.8)    |
| Insomnia                               | 4 (1.3)       | 1 (0.6)                             | 3 (2.3)    |
| Loss of libido                         | 1 (0.3)       | 0                                   | 1 (0.8)    |
| Mood altered                           | 1 (0.3)       | 0                                   | 1 (0.8)    |
| Psychogenic erectile dysfunction       | 1 (0.3)       | 1 (0.6)                             | 0          |
| Psychosexual disorder                  | 1 (0.3)       | 0                                   | 1 (0.8)    |
| <b>Nervous system disorders, n (%)</b> | 20 (6.6)      | 7(4.1)                              | 13 (9.8)   |
| Akathisia                              | 5 (1.6)       | 0                                   | 5 (3.8)    |
| Bradykinesia                           | 1 (0.3)       | 1 (0.6)                             | 0          |
| Dyskinesia                             | 1 (0.3)       | 0                                   | 1 (0.8)    |
| Epilepsy                               | 1 (0.3)       | 0                                   | 1 (0.8)    |
| Extrapyramidal disorder                | 4 (1.3)       | 3 (1.7)                             | 1 (0.8)    |
| Headache                               | 4 (1.3)       | 2 (1.2)                             | 2 (1.5)    |

|                           |         |         |         |
|---------------------------|---------|---------|---------|
| Hypoesthesia              | 1 (0.3) | 1 (0.6) | 0       |
| Lethargy                  | 1 (0.3) | 0       | 1 (0.8) |
| Reduced facial expression | 1 (0.3) | 1 (0.6) | 0       |
| Tremor                    | 4 (1.3) | 0       | 4 (3.0) |

---

LOCF: last observation carried forward.

**Supplementary Table 2:** Conversion from PP1M Mono- or Polytherapy to PP3M Mono- or Polytherapy (modified intent-to-treat population)

|                                             | <b>Total (N=305)</b> | <b>LOCF endpoint symptomatic remission</b> |                   |
|---------------------------------------------|----------------------|--------------------------------------------|-------------------|
|                                             |                      | <b>Yes (n=172)</b>                         | <b>No (n=133)</b> |
| PP1M monotherapy to PP3M monotherapy, n (%) | 253 (83.0)           | 143 (83.1)                                 | 110 (82.7)        |
| PP1M monotherapy to PP3M polytherapy, n (%) | 0                    | 0                                          | 0                 |
| PP1M polytherapy to PP3M monotherapy, n (%) | 0                    | 0                                          | 0                 |
| PP1M polytherapy to PP3M polytherapy, n (%) | 52 (17.0)            | 29 (16.9)                                  | 23 (17.3)         |

**Supplementary Table 3:** Psychotropic medications ( $\geq 1\%$ ) prescribed from 4 months prior to initiation of PP3M treatment until the end of the study (modified intent-to-treat population)

|                                                                                                     | Total<br>(N=305) | LOCF endpoint symptomatic<br>remission |            |
|-----------------------------------------------------------------------------------------------------|------------------|----------------------------------------|------------|
|                                                                                                     |                  | Yes (n=172)                            | No (n=133) |
| <b>Patients prescribed <math>\geq 1</math> psychotropic medication before PP3M start,<br/>n (%)</b> | 130 (42.6)       | 74 (43.0)                              | 56 (42.1)  |
| Biperiden                                                                                           | 25 (8.2)         | 14 (8.1)                               | 11 (8.3)   |
| Olanzapine                                                                                          | 16 (5.2)         | 9 (5.2)                                | 7 (5.3)    |
| Diazepam                                                                                            | 11 (3.6)         | 8 (4.7)                                | 3 (2.3)    |
| Lorazepam                                                                                           | 11 (3.6)         | 7 (4.1)                                | 4 (3.0)    |
| Quetiapine fumarate                                                                                 | 9 (3.0)          | 6 (3.5)                                | 3 (2.3)    |
| Risperidone                                                                                         | 9 (3.0)          | 4 (2.3)                                | 5 (3.8)    |
| Valproate sodium                                                                                    | 9 (3.0)          | 6 (3.5)                                | 3 (2.3)    |
| Aripiprazole                                                                                        | 7 (2.3)          | 4 (2.3)                                | 3 (2.3)    |
| Benzatropine mesilate                                                                               | 7 (2.3)          | 4 (2.3)                                | 3 (2.3)    |
| Trihexyphenidyl                                                                                     | 7 (2.3)          | 5 (2.9)                                | 2 (1.5)    |
| Procyclidine hydrochloride                                                                          | 6 (2.0)          | 5 (2.9)                                | 1 (0.8)    |
| Sertraline                                                                                          | 6 (2.0)          | 5 (2.9)                                | 1 (0.8)    |
| Clonazepam                                                                                          | 5 (1.6)          | 2 (1.2)                                | 3 (2.3)    |

|                               |         |         |         |
|-------------------------------|---------|---------|---------|
| Lithium carbonate             | 5 (1.6) | 2 (1.2) | 3 (2.3) |
| Quetiapine                    | 5 (1.6) | 4 (2.3) | 1 (0.8) |
| Sertraline hydrochloride      | 5 (1.6) | 1 (0.6) | 4 (3.0) |
| Trihexyphenidyl hydrochloride | 5 (1.6) | 4 (2.3) | 1 (0.8) |
| Alprazolam                    | 4 (1.3) | 3 (1.7) | 1 (0.8) |
| Amisulpride                   | 4 (1.3) | 0       | 4 (3.0) |
| Chlorpromazine                | 4 (1.3) | 3 (1.7) | 1 (0.8) |
| Escitalopram                  | 4 (1.3) | 4 (2.3) | 0       |
| Estazolam                     | 4 (1.3) | 3 (1.7) | 1 (0.8) |
| Venlafaxine hydrochloride     | 4 (1.3) | 2 (1.2) | 2 (1.5) |
| Haloperidol                   | 3 (1.0) | 3 (1.7) | 0       |
| Paliperidone                  | 3 (1.0) | 1 (0.6) | 2 (1.5) |
| Zolpidem                      | 3 (1.0) | 0       | 3 (2.3) |
| Zopiclone                     | 3 (1.0) | 1 (0.6) | 2 (1.5) |

---

LOCF: last observation carried forward; PP3M: paliperidone palmitate 3-monthly.

**Supplementary Table 4:** Psychotropic medications ( $\geq 1\%$ ) prescribed after the initiation of PP3M treatment until the end of the study (modified intent-to-treat population)

|                                                                                                | Total<br>(N=305) | LOCF endpoint symptomatic remission |            |
|------------------------------------------------------------------------------------------------|------------------|-------------------------------------|------------|
|                                                                                                |                  | Yes (n=172)                         | No (n=133) |
| <b>Patients prescribed <math>\geq 1</math> psychotropic medication after PP3M start, n (%)</b> | 130 (42.6)       | 74 (43.0)                           | 56 (42.1)  |
| Lorazepam                                                                                      | 16 (5.2)         | 10 (5.8)                            | 6 (4.5)    |
| Paliperidone                                                                                   | 14 (4.6)         | 2 (1.2)                             | 12 (9.0)   |
| Risperidone                                                                                    | 12 (3.9)         | 5 (2.9)                             | 7 (5.3)    |
| Olanzapine                                                                                     | 11 (3.6)         | 4 (2.3)                             | 7 (5.3)    |
| Biperiden                                                                                      | 10 (3.3)         | 6 (3.5)                             | 4 (3.0)    |
| Diazepam                                                                                       | 8 (2.6)          | 5 (2.9)                             | 3 (2.3)    |
| Clonazepam                                                                                     | 6 (2.0)          | 4 (2.3)                             | 2 (1.5)    |
| Zolpidem tartrate                                                                              | 6 (2.0)          | 3 (1.7)                             | 3 (2.3)    |
| Alprazolam                                                                                     | 5 (1.6)          | 3 (1.7)                             | 2 (1.5)    |
| Quetiapine fumarate                                                                            | 5 (1.6)          | 1 (0.6)                             | 4 (3.0)    |
| Trihexyphenidyl                                                                                | 5 (1.6)          | 0                                   | 5 (3.8)    |
| Zolpidem                                                                                       | 5 (1.6)          | 2 (1.2)                             | 3 (2.3)    |
| Aripiprazole                                                                                   | 4 (1.3)          | 0                                   | 4 (3.0)    |

|                            |         |         |         |
|----------------------------|---------|---------|---------|
| Paracetamol                | 4 (1.3) | 0       | 4 (3.0) |
| Procyclidine hydrochloride | 4 (1.3) | 3 (1.7) | 1 (0.8) |
| Quetiapine                 | 4 (1.3) | 2 (1.2) | 2 (1.5) |
| Sertraline hydrochloride   | 4 (1.3) | 2 (1.2) | 2 (1.5) |
| Amisulpride                | 3 (1.0) | 2 (1.2) | 1 (0.8) |
| Benzatropine mesilate      | 3 (1.0) | 2 (1.2) | 1 (0.8) |
| Mirtazapine                | 3 (1.0) | 1 (0.6) | 2 (1.5) |
| Phenazepam                 | 3 (1.0) | 0       | 3 (2.3) |
| Zopiclone                  | 3 (1.0) | 0       | 3 (2.3) |

---

LOCF: last observation carried forward; PP3M: paliperidone palmitate 3-monthly.
